# Supplementary figures and images for: Close sequence comparisons are sufficient to identify human cis-regulatory elements.
Source: HighWire-hosted journal article supplement (doi:10.1101/gr.4717506), 2006-07-01

## Supplementary Figure 2

$$S = S(H,M) + S(M,C) + S(C,D) + S(D,L) + S(L,H)$$

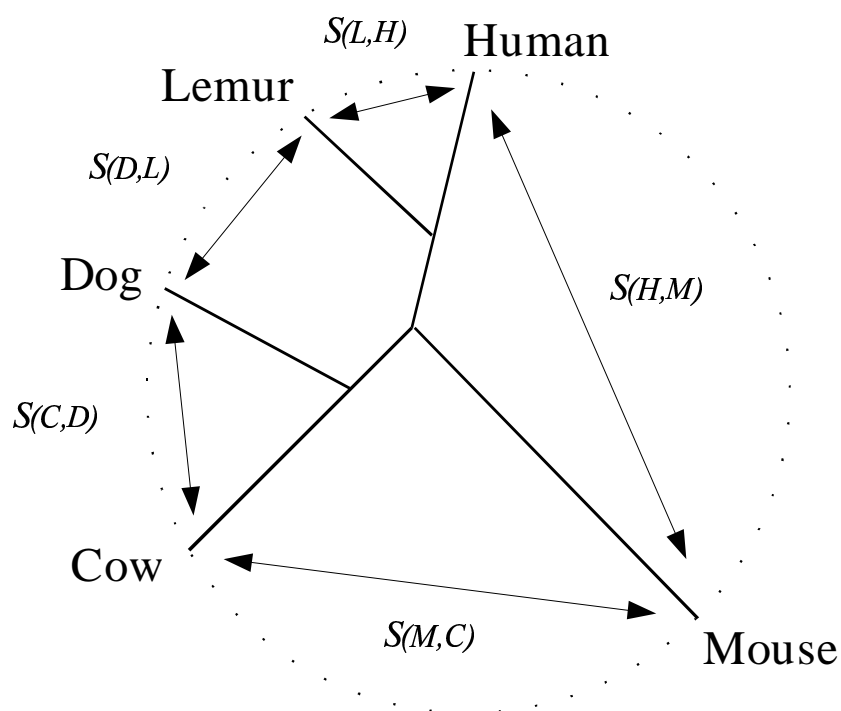

Supplement: SuppFig2.pdf [file SuppFig2.pdf]
